# Supplementary material
Source: Research Square preprint supplement (doi:10.21203/rs.3.rs-9359606/v1)
Supplement: Supplementary file 1 [file 155bdceb5730955787ba14e5.pdf]

# **Supplementary Information of “Symmetry-protected four double-Weyl fermions and their topological phase transitions in nonmagnetic crystals”**

Yun-Yun Bai<sup>\*</sup>, Ke-Xin Pang<sup>\*</sup>, and Yan Gao<sup>†</sup>

*State Key Laboratory of Metastable Materials Science and Technology & Hebei Key Laboratory of  
Microstructural Material Physics, School of Science, Yanshan University, Qinhuangdao 066004,  
China*

---

<sup>\*</sup>These authors contributed equally to this work.

<sup>†</sup>Corresponding author: yangao9419@ysu.edu.cn

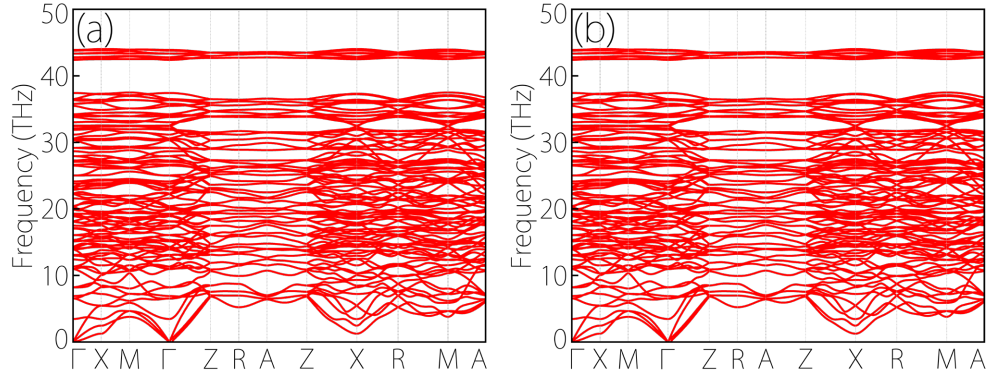

**Supplementary Figure S1 | Phonon dispersion spectra.** Calculated phonon band structure of (a) *l*-THRLN-C<sub>32</sub> and (b) *r*-THRLN-C<sub>32</sub> along the complete high-symmetry paths of the Brillouin zone. The absence of imaginary frequencies confirms the dynamical stability of THRLN-C<sub>32</sub>.

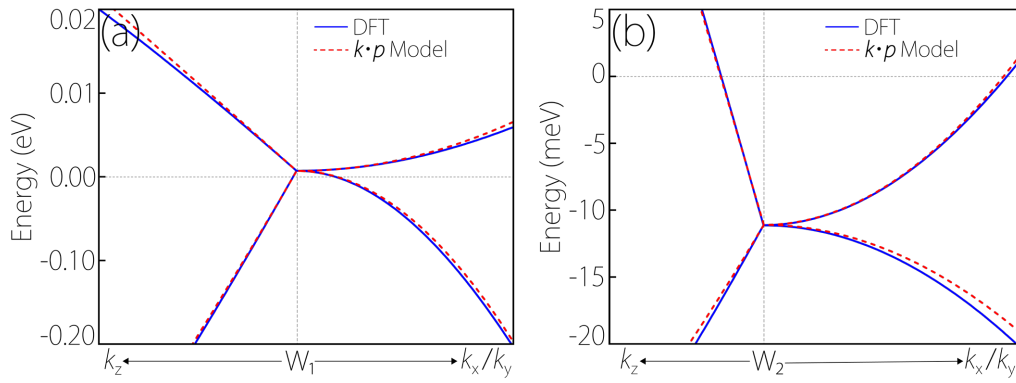

**Supplementary Figure S2 | The  $\mathbf{k} \cdot \mathbf{p}$  effective Hamiltonian band versus the DFT band structures for *r*-THRLN-C<sub>32</sub>.** **a**, Band dispersion along  $k_z$  and  $k_x/k_y$  at  $W_1$  from DFT calculations (blue solid lines) and  $\mathbf{k} \cdot \mathbf{p}$  model fitting (red dashed lines). Parameters for the  $\mathbf{k} \cdot \mathbf{p}$  effective Hamiltonian:  $\epsilon_0 = 0.82$  meV,  $\epsilon_1 = 0.21$  eV  $\cdot$  Å,  $\epsilon_2 = -2.75$  eV  $\cdot$  Å<sup>2</sup>,  $\epsilon_3 = 0.59$  eV  $\cdot$  Å<sup>2</sup>,  $\delta_1 = -0.66$  eV  $\cdot$  Å,  $\delta_2 = 4.83$  eV  $\cdot$  Å<sup>2</sup>,  $\delta_3 = -0.74$  eV  $\cdot$  Å<sup>2</sup>,  $\alpha = 1.42 + 1.72i$  eV  $\cdot$  Å<sup>2</sup>,  $\beta = -2.12 - 2.56i$  eV  $\cdot$  Å<sup>2</sup>. **b**, Band dispersion along  $k_z$  and  $k_x/k_y$  at  $W_2$  from DFT calculations (blue solid lines) and  $\mathbf{k} \cdot \mathbf{p}$  model fitting (red dashed lines). Parameters for the  $\mathbf{k} \cdot \mathbf{p}$  effective Hamiltonian:  $\epsilon_0 = -11.35$  meV,  $\epsilon_1 = -0.34$  eV  $\cdot$  Å,  $\epsilon_2 = 0.90$  eV  $\cdot$  Å<sup>2</sup>,  $\epsilon_3 = 0.52$  eV  $\cdot$  Å<sup>2</sup>,  $\delta_1 = 0.97$  eV  $\cdot$  Å,  $\delta_2 = 3.85$  eV  $\cdot$  Å<sup>2</sup>,  $\delta_3 = 1.77$  eV  $\cdot$  Å<sup>2</sup>,  $\alpha = 0.18 + 0.10i$  eV  $\cdot$  Å<sup>2</sup>,  $\beta = -1.20 - 0.66i$  eV  $\cdot$  Å<sup>2</sup>.

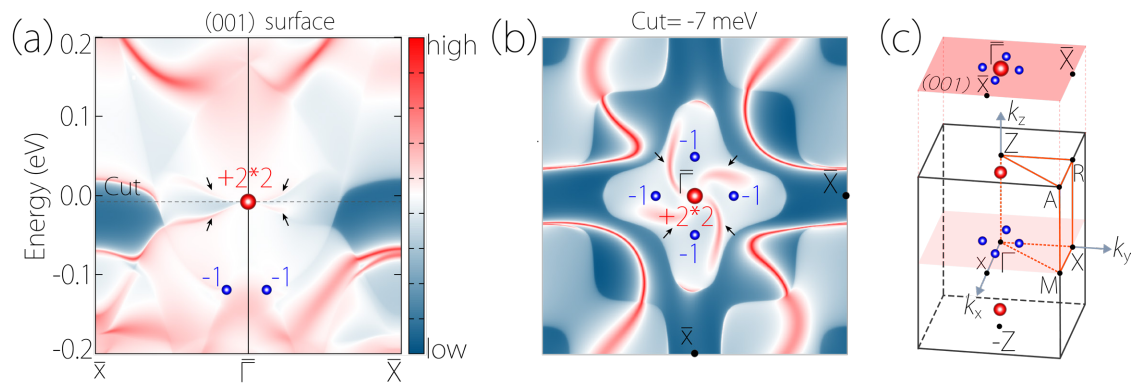

**Supplementary Figure S3 | Quadruple spiral Fermi arcs on the (001) surface.** **a**, Calculated surface spectral function projected onto the (001) surface of *r*-THRLN-C<sub>32</sub> under a -7 GPa hydrostatic pressure. The dashed line indicates the energy level of the constant-energy contour shown in (b). **b**, Isoenergy contour at -7 meV, revealing striking quadruple spiral Fermi arcs connecting the projected topological nodes (indicated by black arrows). **c**, Spatial distribution of the six WPs in the BZ and their corresponding (001) surface projections.

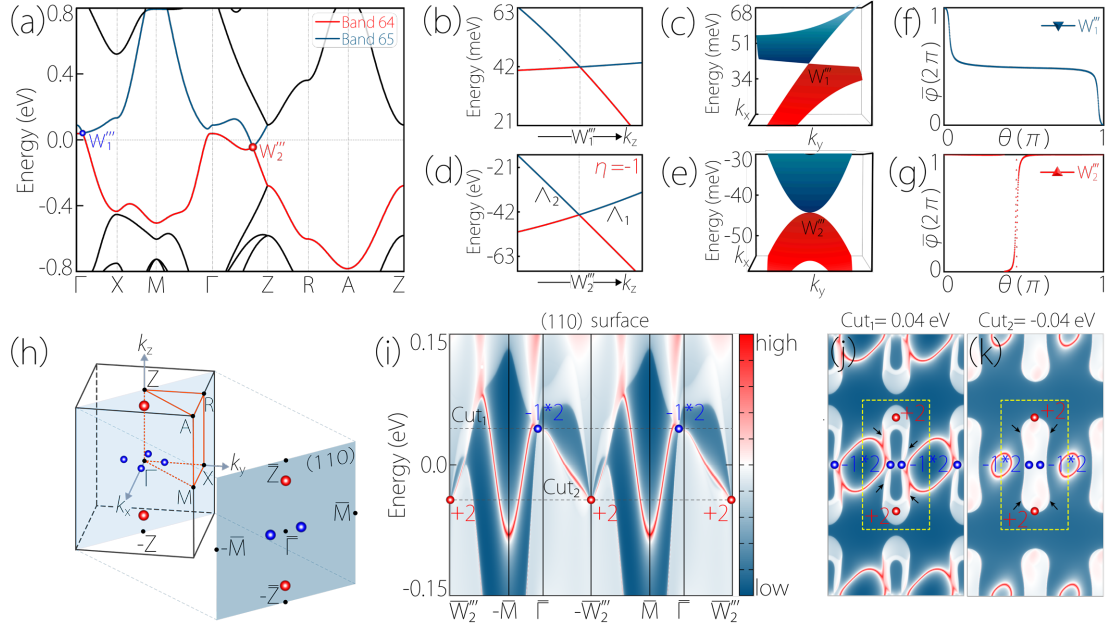

**Supplementary Figure S4 | Topological phase transition into two TTWCs under a +6% uniaxial strain along the  $c$ -axis.** Electronic and topological properties of  $r$ -THRLN- $C_{32}$ . **a**, Bulk band structure along high-symmetry paths showing the formation of  $W_1'''$  and  $W_2'''$  nodes. **b**, **c**, Linear dispersion profiles of  $W_1'''$  across three momentum directions. **d**, **e**, Linear-quadratic mixed dispersion of  $W_2'''$ , with the IRRs ( $\Lambda_1$ ,  $\Lambda_2$ ) and the  $\eta = -1$  eigenvalue ratio explicitly labeled. **f**, **g**, WCC evolution confirming topological charges of -1 and +2 for  $W_1'''$  and  $W_2'''$ , respectively. **h**, Spatial distribution of the WPs in the BZ and their corresponding (110) surface projections. **i**, Surface spectral function calculated on the (110) boundary. **j**, **k**, Isoenergy contours at 0.04 eV and -0.04 eV, respectively, illustrating the evolution of the Fermi arcs connecting the dissociated TTWCs. Yellow dashed lines denote the first BZ boundaries, and black arrows indicate Fermi arc positions.

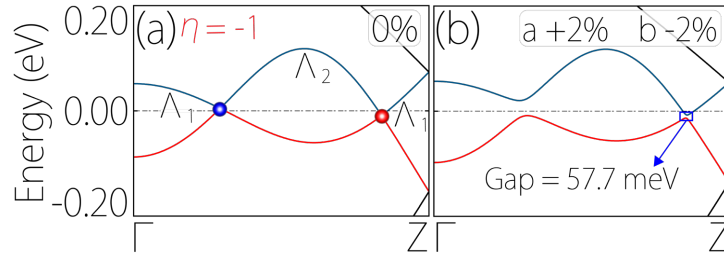

**Supplementary Figure S5 | Band structure evolution under asymmetric biaxial strain. a,** Schematic of the electronic band evolution for  $r$ -THRLN- $C_{32}$  subjected to a simultaneous +2% tensile strain along the  $a$ -axis and a -2% compressive strain along the  $b$ -axis. The explicit breaking of  $C_4$  symmetry drives a topological phase transition from the pristine phase containing four DWPs ( $|C| = 2$ , 0% strain) to a conventional WSM phase hosting four pairs of conventional WPs (+2%  $a$ -axis and -2%  $b$ -axis).

**Table SI.** | Space groups and crystallographic parameters for *l*-THRLN-C<sub>32</sub> and *r*-THRLN-C<sub>32</sub>. Comparison of the space groups, optimized lattice parameters, and detailed Wyckoff positions for the *l*-THRLN-C<sub>32</sub> and *r*-THRLN-C<sub>32</sub> enantiomers.

| Structures                      | Space groups                                    | Lattice parameters (Å) |      |      | Wyckoff positions               |
|---------------------------------|-------------------------------------------------|------------------------|------|------|---------------------------------|
|                                 |                                                 | a                      | b    | c    |                                 |
| <i>l</i> -CNTFX-C <sub>32</sub> | <i>P</i> <sub>4</sub> <sub>3</sub> <sub>2</sub> | 7.32                   | 7.32 | 5.00 | 8d (0.43312, 0.29592, 0.37717)  |
|                                 |                                                 |                        |      |      | 8d (0.54531, 0.30456, 0.12074)  |
|                                 |                                                 |                        |      |      | 8d (0.91155, 0.58443, 0.31423)  |
|                                 |                                                 |                        |      |      | 4a (0, 0.2861, 0)               |
|                                 |                                                 |                        |      |      | 4a (0, 0.91063, 0.5)            |
| <i>r</i> -CNTFX-C <sub>32</sub> | <i>P</i> <sub>4</sub> <sub>1</sub> <sub>2</sub> | 7.32                   | 7.32 | 5.00 | 8d (0.56688, 0.70408, 0.62283 ) |
|                                 |                                                 |                        |      |      | 8d (0.45469, 0.69544, 0.87926)  |
|                                 |                                                 |                        |      |      | 8d (0.08845, 0.41557, 0.68577)  |
|                                 |                                                 |                        |      |      | 4a (0, 0.71391, 0)              |
|                                 |                                                 |                        |      |      | 4a (0, 0.08937, 0.5)            |

**Table SII.** | Elastic constants and corresponding stability criteria for *l*-THRLN-C<sub>32</sub> and *r*-THRLN-C<sub>32</sub>.

| Structures                      | Elasticity constants |                 |                 |                 |                 |                 | Stability criteria                                                                                                                                                      |
|---------------------------------|----------------------|-----------------|-----------------|-----------------|-----------------|-----------------|-------------------------------------------------------------------------------------------------------------------------------------------------------------------------|
|                                 | C <sub>11</sub>      | C <sub>12</sub> | C <sub>13</sub> | C <sub>33</sub> | C <sub>44</sub> | C <sub>66</sub> |                                                                                                                                                                         |
| <i>l</i> -CNTFX-C <sub>32</sub> | 284.129              | 94.187          | 107.244         | 515.490         | 64.112          | 3.775           | C <sub>11</sub> >  C <sub>12</sub>  ; C <sub>33</sub> (C <sub>11</sub> +C <sub>12</sub> ) > 2C <sub>13</sub> <sup>2</sup> ;<br>C <sub>44</sub> > 0; C <sub>66</sub> > 0 |
| <i>r</i> -CNTFX-C <sub>32</sub> | 281.273              | 94.780          | 108.679         | 515.577         | 64.698          | 4.199           |                                                                                                                                                                         |

**Table SIII. | Structural and physical properties of carbon allotropes.** Comparison of the space groups, optimized lattice parameters (Å), bond lengths (Å), densities (g/cm<sup>3</sup>), total energies  $E_{\text{tot}}$  (eV per C atom), bulk modulus (GPa), and corresponding bulk topological properties (WSM: Weyl semimetal, NLSM: nodal-line semimetal) for  $l/r$ -THRLN-C<sub>32</sub> and other representative carbon allotropes (T-carbon, oC<sub>24</sub>, cP-C<sub>24</sub>, fco-C<sub>6</sub>, oP16, and Diamond).

| Structure                  | Space groups   | Lattice parameters (Å) |      |      | Band lengths (Å) | Density (g/cm <sup>3</sup> ) | $E_{\text{tot}}$ (eV/C) | Bulk modulus (GPa) | Properties |
|----------------------------|----------------|------------------------|------|------|------------------|------------------------------|-------------------------|--------------------|------------|
|                            |                | a                      | b    | c    |                  |                              |                         |                    |            |
| $l$ -CNTFX-C <sub>32</sub> | $P4_322$       | 7.32                   | 7.32 | 5.00 | 1.38-1.57        | 2.38                         | -8.10                   | 189.2              | WSM        |
| $r$ -CNTFX-C <sub>32</sub> | $P4_122$       |                        |      |      |                  |                              |                         |                    |            |
| T-carbon                   | $Fd\bar{3}m$   | 7.52                   | 7.52 | 7.52 | 1.42,1.50        | 1.50                         | -7.92                   | 155.5              | Insulator  |
| oC <sub>24</sub>           | $Cmmm$         | 13.6                   | 8.87 | 2.47 | 1.41-1.52        | 1.60                         | -9.01                   | 187.1              | NLSM       |
| cP-C <sub>24</sub>         | $P4_132$       | 5.96                   | 5.96 | 5.96 | 1.43, 1.45       | 2.27                         | -8.45                   | 243.4              | WSM        |
| fco-C <sub>6</sub>         | $F222 (D_2^7)$ | 6.84                   | 3.33 | 8.78 | 1.41-1.49        | 2.39                         | -8.46                   | 270.4              | WSM        |
| oP16                       | $Pcca$         | 4.65                   | 4.28 | 5.13 | 1.35-1.69        | 3.13                         | -8.68                   | 336.1              | NLSM       |
| Diamond                    | $Fd\bar{3}m$   | 3.57                   | 3.57 | 3.57 | 1.54             | 3.50                         | -9.09                   | 434.9              | Insulator  |

**Table SIV. | Evolution of the four double-Weyl points under mechanical strain for  $r$ -THRLN-C<sub>32</sub>.** Exact momentum-space coordinates ( $k_1, k_2, k_3$ ), energies relative to  $E_F$ , chiral topological charges, and multiplicities of the dynamically reconfigured Weyl points ( $W'_1, W'_2; W''_1, W''_2; W'''_1, W'''_2$ ) subjected to a -7 GPa hydrostatic pressure, a +6% uniaxial strain along the  $c$ -axis, and a +2% uniaxial strain along the  $a$ -axis.

| Strain Engineering | Space Group | WP       | E (meV) | Coordinate ( $k_1, k_2, k_3$ ) | Charge | Multiplicity |
|--------------------|-------------|----------|---------|--------------------------------|--------|--------------|
| -7GPa              | $P4_122$    | $W'_1$   | -117.72 | $\pm(0, 0.075, 0)$             | -1     | 4            |
|                    |             | $W'_2$   | -7.50   | $\pm(0, 0, 0.440)$             | +2     | 2            |
| a +2%              | $P4_122$    | $W''_1$  | -46.69  | $\pm(0.085, 0, 0.141)$         | -1     | 4            |
|                    |             | $W''_2$  | -5.46   | $\pm(0, 0.089, 0.426)$         | +1     | 4            |
| c +6%              | $P4_122$    | $W'''_1$ | -43.39  | $\pm(0, 0.075, 0)$             | -1     | 4            |
|                    |             | $W'''_2$ | 41.90   | $\pm(0, 0, 0.365)$             | +2     | 2            |

**Table SV. Symmetry-allowed space groups hosting exactly four double-Weyl points (DWPs, C-2) in nonmagnetic crystals.** The listed space groups (SGs) accommodate this configuration in both the spinless (without SOC) and spinful (with SOC) limits. HSPs/HSLs denote the high-symmetry points or lines at which one and two DWPs are located. IRRs refer to the irreducible (co)representations of the corresponding little groups associated with the Weyl points.

| SG          | Generators                                                              | HSP/Ls for one C-2 WP (IRRs)                                                             | HSP/Ls for two C-2 WPS (IRRs)                                                                                                    |
|-------------|-------------------------------------------------------------------------|------------------------------------------------------------------------------------------|----------------------------------------------------------------------------------------------------------------------------------|
| Without SOC |                                                                         |                                                                                          |                                                                                                                                  |
| 75          | $\{C_{4z}^+ 000\}$ ,<br>T                                               | $\Gamma(\{R_2, R_4\})$ ;<br>M $\{R_2, R_4\}$ ;<br>Z $\{R_2, R_4\}$ ;<br>A $\{R_2, R_4\}$ | $\Gamma Z (\{R_1\}, \{R_3\}; \{R_2\}, \{R_4\})$ ;<br>MA $\{R_1\}, \{R_3\}; \{R_2\}, \{R_4\}$                                     |
| 76          | $\{C_{4z}^+   00 \frac{1}{4}\}$ ,<br>T                                  | $\Gamma(\{R_2, R_4\})$ ;<br>M $\{R_2, R_4\}$                                             | $\Gamma Z (\{R_1\}, \{R_3\}; \{R_2\}, \{R_4\})$ ;<br>MA $\{R_1\}, \{R_3\}; \{R_2\}, \{R_4\}$                                     |
| 77          | $\{C_{4z}^+   00 \frac{1}{2}\}$ ,<br>T                                  | $\Gamma(\{R_2, R_4\})$ ;<br>M $\{R_2, R_4\}$ ;<br>Z $\{R_2, R_4\}$ ;<br>A $\{R_2, R_4\}$ | $\Gamma Z (\{R_1\}, \{R_3\}; \{R_2\}, \{R_4\})$ ;<br>MA $\{R_1\}, \{R_3\}; \{R_2\}, \{R_4\}$                                     |
| 78          | $\{C_{4z}^+   00 \frac{3}{4}\}$ ,<br>T                                  | $\Gamma(\{R_2, R_4\})$ ;<br>M $\{R_2, R_4\}$                                             | $\Gamma Z (\{R_1\}, \{R_3\}; \{R_2\}, \{R_4\})$ ;<br>MA $\{R_1\}, \{R_3\}; \{R_2\}, \{R_4\}$                                     |
| 79          | $\{C_{4z}^+ 000\}$ ,<br>T                                               | $\Gamma (\{R_2, R_4\})$ ;<br>Z $\{R_2, R_4\}$                                            | P $\{R_1, R_2\}$ ;<br>$\Gamma \wedge \Gamma Z (\{R_1\}, \{R_3\}; \{R_2\}, \{R_4\})$ ;<br>ZV $\{R_1\}, \{R_3\}; \{R_2\}, \{R_4\}$ |
| 80          | $\{C_{4z}^+   \frac{3}{4} \frac{1}{4} \frac{1}{2}\}$ ,<br>T             | $\Gamma(\{R_2, R_4\})$ ;<br>Z $\{R_2, R_4\}$                                             | $\Gamma \wedge \Gamma Z (\{R_1\}, \{R_3\}; \{R_2\}, \{R_4\})$ ;<br>ZV $\{R_1\}, \{R_3\}; \{R_2\}, \{R_4\}$                       |
| 89          | $\{C_{4z}^+ 000\}$ ,<br>$\{C_{2x} 000\}$ ,<br>T                         | $\Gamma(R_5)$ ;<br>M $(R_5)$ ;<br>Z $(R_5)$ ;<br>A $(R_5)$                               | $\Gamma Z (\{R_1\}, \{R_3\}; \{R_2\}, \{R_4\})$ ;<br>MA $\{R_1\}, \{R_3\}; \{R_2\}, \{R_4\}$                                     |
| 90          | $\{C_{4z}^+ 000\}$ ,<br>$\{C_{2x}   \frac{1}{2} \frac{1}{2} 0\}$ ,<br>T | $\Gamma(R_5)$ ;<br>Z $(R_5)$                                                             | $\Gamma Z (\{R_1\}, \{R_3\}; \{R_2\}, \{R_4\})$                                                                                  |
| 91          | $\{C_{4z}^+   00 \frac{1}{4}\}$ ,<br>$\{C_{2x} 000\}$ ,<br>T            | $\Gamma(R_5)$ ;<br>M $(R_5)$                                                             | $\Gamma Z (\{R_1\}, \{R_3\}; \{R_2\}, \{R_4\})$ ;<br>MA $\{R_1\}, \{R_3\}; \{R_2\}, \{R_4\}$                                     |

| SG  | Generators                                                                  | HSP/Ls for one C-2 WP (IRRs)                                                          | HSP/Ls for two C-2 WPS (IRRs)                                                                                                             |
|-----|-----------------------------------------------------------------------------|---------------------------------------------------------------------------------------|-------------------------------------------------------------------------------------------------------------------------------------------|
| 92  | $\{C_{4z}^+   00 \frac{1}{4}\},$<br>$\{C_{2x}^+   \frac{11}{22} 0\},$<br>T  |                                                                                       | $\Gamma Z (\{R_1\}, \{R_3\}; \{R_2\}, \{R_4\})$                                                                                           |
| 93  | $\{C_{4z}^+   00 \frac{1}{2}\},$<br>$\{C_{2x}^+   000\},$<br>T              | $\Gamma(R_5);$<br>M (R <sub>5</sub> );<br>Z (R <sub>5</sub> );<br>A (R <sub>5</sub> ) | $\Gamma Z (\{R_1\}, \{R_3\}; \{R_2\}, \{R_4\});$<br>MA ( $\{R_1\}, \{R_3\}; \{R_2\}, \{R_4\}$ )                                           |
| 94  | $\{C_{4z}^+   00 \frac{1}{2}\},$<br>$\{C_{2x}^+   \frac{11}{22} 0\},$<br>T  | $\Gamma(R_5);$<br>Z (R <sub>5</sub> )                                                 | $\Gamma Z (\{R_1\}, \{R_3\}; \{R_2\}, \{R_4\})$                                                                                           |
| 95  | $\{C_{4z}^+   00 \frac{3}{4}\},$<br>$\{C_{2x}^+   000\},$<br>T              | $\Gamma(R_5);$<br>M (R <sub>5</sub> )                                                 | $\Gamma Z (\{R_1\}, \{R_3\}; \{R_2\}, \{R_4\});$<br>MA ( $\{R_1\}, \{R_3\}; \{R_2\}, \{R_4\}$ )                                           |
| 96  | $\{C_{4z}^+   00 \frac{3}{4}\},$<br>$\{C_{2x}^+   \frac{11}{22} 0\},$<br>T  |                                                                                       | $\Gamma Z (\{R_1\}, \{R_3\}; \{R_2\}, \{R_4\})$                                                                                           |
| 97  | $\{C_{4z}^+   000\},$<br>$\{C_{2x}^+   000\},$<br>T                         | $\Gamma(R_5);$<br>Z (R <sub>5</sub> )                                                 | P ( $\{R_3, R_4\}$ );<br>$\Gamma \Lambda / \Gamma Z (\{R_1\}, \{R_3\}; \{R_2\}, \{R_4\});$<br>ZV ( $\{R_1\}, \{R_3\}; \{R_2\}, \{R_4\}$ ) |
| 98  | $\{C_{4z}^+   \frac{311}{442}\},$<br>$\{C_{2x}^+   0 \frac{11}{22}\},$<br>T | $\Gamma(R_5);$<br>Z (R <sub>5</sub> )                                                 | $\Gamma \Lambda / \Gamma Z (\{R_1\}, \{R_3\}; \{R_2\}, \{R_4\});$<br>ZV ( $\{R_1\}, \{R_3\}; \{R_2\}, \{R_4\}$ )                          |
| 168 | $\{C_6^+   000\},$<br>T                                                     | $\Gamma(\{R_2, R_6\};$<br>$\{R_3, R_5\});$<br>A( $\{R_2, R_6\};$<br>$\{R_3, R_5\}$ )  | $\Gamma A (\{R_1\}, \{R_3\}; \{R_1\}, \{R_5\}; \{R_2\}, \{R_4\};$<br>$\{R_2\}, \{R_6\}; \{R_3\}, \{R_5\}; \{R_4\}, \{R_6\})$              |
| 169 | $\{C_6^+   00 \frac{1}{6}\},$<br>T                                          |                                                                                       | $\Gamma A (\{R_1\}, \{R_3\}; \{R_1\}, \{R_5\}; \{R_2\}, \{R_4\};$<br>$\{R_2\}, \{R_6\}; \{R_3\}, \{R_5\}; \{R_4\}, \{R_6\})$              |
| 170 | $\{C_6^+   00 \frac{5}{6}\},$<br>T                                          |                                                                                       | $\Gamma A (\{R_1\}, \{R_3\}; \{R_1\}, \{R_5\}; \{R_2\}, \{R_4\};$<br>$\{R_2\}, \{R_6\}; \{R_3\}, \{R_5\}; \{R_4\}, \{R_6\})$              |

| SG       | Generators                                                 | HSP/Ls for one C-2 WP (IRRs)                                                       | HSP/Ls for two C-2 WPS (IRRs)                                                                                                |
|----------|------------------------------------------------------------|------------------------------------------------------------------------------------|------------------------------------------------------------------------------------------------------------------------------|
| 171      | $\{C_6^+   00 \frac{1}{3}\},$<br>T                         | $\Gamma(\{R_2, R_6\};$<br>$\{R_3, R_5\});$<br>$A(\{R_2, R_6\};$<br>$\{R_3, R_5\})$ | $\Gamma A (\{R_1\}, \{R_3\}; \{R_1\}, \{R_5\}; \{R_2\}, \{R_4\};$<br>$\{R_2\}, \{R_6\}; \{R_3\}, \{R_5\}; \{R_4\}, \{R_6\})$ |
| 172      | $\{C_6^+   00 \frac{2}{3}\},$<br>T                         | $\Gamma(\{R_2, R_6\};$<br>$\{R_3, R_5\});$<br>$A(\{R_2, R_6\};$<br>$\{R_3, R_5\})$ | $\Gamma A (\{R_1\}, \{R_3\}; \{R_1\}, \{R_5\}; \{R_2\}, \{R_4\};$<br>$\{R_2\}, \{R_6\}; \{R_3\}, \{R_5\}; \{R_4\}, \{R_6\})$ |
| 173      | $\{C_6^+   00 \frac{1}{2}\},$<br>T                         |                                                                                    | $\Gamma A (\{R_1\}, \{R_3\}; \{R_1\}, \{R_5\}; \{R_2\}, \{R_4\};$<br>$\{R_2\}, \{R_6\}; \{R_3\}, \{R_5\}; \{R_4\}, \{R_6\})$ |
| 177      | $\{C_6^+   000\},$<br>$\{C_{21}'   000\},$<br>T            | $\Gamma(R_5; R_6);$<br>$A(R_5; R_6)$                                               | $\Gamma A (\{R_1\}, \{R_3\}; \{R_1\}, \{R_5\}; \{R_2\}, \{R_4\};$<br>$\{R_2\}, \{R_6\}; \{R_3\}, \{R_5\}; \{R_4\}, \{R_6\})$ |
| 178      | $\{C_6^+   00 \frac{1}{6}\},$<br>$\{C_{21}'   000\},$<br>T |                                                                                    | $\Gamma A (\{R_1\}, \{R_3\}; \{R_1\}, \{R_5\}; \{R_2\}, \{R_4\};$<br>$\{R_2\}, \{R_6\}; \{R_3\}, \{R_5\}; \{R_4\}, \{R_6\})$ |
| 179      | $\{C_6^+   00 \frac{5}{6}\},$<br>$\{C_{21}'   000\},$<br>T |                                                                                    | $\Gamma A (\{R_1\}, \{R_3\}; \{R_1\}, \{R_5\}; \{R_2\}, \{R_4\};$<br>$\{R_2\}, \{R_6\}; \{R_3\}, \{R_5\}; \{R_4\}, \{R_6\})$ |
| 180      | $\{C_6^+   00 \frac{1}{3}\},$<br>$\{C_{21}'   000\},$<br>T | $\Gamma(R_5; R_6);$<br>$A(R_5; R_6)$                                               | $\Gamma A (\{R_1\}, \{R_3\}; \{R_1\}, \{R_5\}; \{R_2\}, \{R_4\};$<br>$\{R_2\}, \{R_6\}; \{R_3\}, \{R_5\}; \{R_4\}, \{R_6\})$ |
| 181      | $\{C_6^+   00 \frac{2}{3}\},$<br>$\{C_{21}'   000\},$<br>T | $\Gamma(R_5; R_6);$<br>$A(R_5; R_6)$                                               | $\Gamma A (\{R_1\}, \{R_3\}; \{R_1\}, \{R_5\}; \{R_2\}, \{R_4\};$<br>$\{R_2\}, \{R_6\}; \{R_3\}, \{R_5\}; \{R_4\}, \{R_6\})$ |
| 182      | $\{C_6^+   00 \frac{1}{2}\},$<br>$\{C_{21}'   000\},$<br>T |                                                                                    | $\Gamma A (\{R_1\}, \{R_3\}; \{R_1\}, \{R_5\}; \{R_2\}, \{R_4\};$<br>$\{R_2\}, \{R_6\}; \{R_3\}, \{R_5\}; \{R_4\}, \{R_6\})$ |
| With SOC |                                                            |                                                                                    |                                                                                                                              |
| 75       | $\{C_{4z}^+   000\},$<br>T                                 |                                                                                    | $\Gamma Z (\{R_2\}, \{R_6\}; \{R_4\}, \{R_8\});$<br>$MA (\{R_2\}, \{R_6\}; \{R_4\}, \{R_8\})$                                |
| 76       | $\{C_{4z}^+   00 \frac{1}{4}\},$<br>T                      |                                                                                    | $\Gamma Z (\{R_2\}, \{R_6\}; \{R_4\}, \{R_8\});$<br>$MA (\{R_2\}, \{R_6\}; \{R_4\}, \{R_8\})$                                |

| SG | Generators                                                                         | HSP/Ls for one C-2 WP (IRRs) | HSP/Ls for two C-2 WPS (IRRs)                                                                                                         |
|----|------------------------------------------------------------------------------------|------------------------------|---------------------------------------------------------------------------------------------------------------------------------------|
| 77 | $\{C_{4z}^+   00 \frac{1}{2}\},$<br>T                                              |                              | $\Gamma Z (\{R_2\}, \{R_6\}; \{R_4\}, \{R_8\});$<br>$MA (\{R_2\}, \{R_6\}; \{R_4\}, \{R_8\})$                                         |
| 78 | $\{C_{4z}^+   00 \frac{3}{4}\},$<br>T                                              |                              | $\Gamma Z (\{R_2\}, \{R_6\}; \{R_4\}, \{R_8\});$<br>$MA (\{R_2\}, \{R_6\}; \{R_4\}, \{R_8\})$                                         |
| 79 | $\{C_{4z}^+   000\},$<br>T                                                         |                              | $\Gamma \Lambda / \Gamma Z (\{R_2\}, \{R_6\}; \{R_4\}, \{R_8\});$<br>$ZV (\{R_2\}, \{R_6\}; \{R_4\}, \{R_8\})$                        |
| 80 | $\{C_{4z}^+   \frac{3}{4} \frac{1}{4} \frac{1}{2}\},$<br>T                         |                              | $P (\{R_4, R_4\});$<br>$\Gamma \Lambda / \Gamma Z (\{R_2\}, \{R_6\}; \{R_4\}, \{R_8\});$<br>$ZV (\{R_2\}, \{R_6\}; \{R_4\}, \{R_8\})$ |
| 89 | $\{C_{4z}^+   000\},$<br>$\{C_{2x}   000\},$<br>T                                  |                              | $\Gamma Z (\{R_2\}, \{R_6\}; \{R_4\}, \{R_8\});$<br>$MA (\{R_2\}, \{R_6\}; \{R_4\}, \{R_8\})$                                         |
| 90 | $\{C_{4z}^+   000\},$<br>$\{C_{2x}   \frac{1}{2} \frac{1}{2} 0\},$<br>T            |                              | $\Gamma Z (\{R_2\}, \{R_6\}; \{R_4\}, \{R_8\})$                                                                                       |
| 91 | $\{C_{4z}^+   00 \frac{1}{4}\},$<br>$\{C_{2x}   000\},$<br>T                       |                              | $\Gamma Z (\{R_2\}, \{R_6\}; \{R_4\}, \{R_8\});$<br>$MA (\{R_2\}, \{R_6\}; \{R_4\}, \{R_8\})$                                         |
| 92 | $\{C_{4z}^+   00 \frac{1}{4}\},$<br>$\{C_{2x}   \frac{1}{2} \frac{1}{2} 0\},$<br>T |                              | $\Gamma Z (\{R_2\}, \{R_6\}; \{R_4\}, \{R_8\})$                                                                                       |
| 93 | $\{C_{4z}^+   00 \frac{1}{2}\},$<br>$\{C_{2x}   000\},$<br>T                       |                              | $\Gamma Z (\{R_2\}, \{R_6\}; \{R_4\}, \{R_8\});$<br>$MA (\{R_2\}, \{R_6\}; \{R_4\}, \{R_8\})$                                         |
| 94 | $\{C_{4z}^+   00 \frac{1}{2}\},$<br>$\{C_{2x}   \frac{1}{2} \frac{1}{2} 0\},$<br>T |                              | $\Gamma Z (\{R_2\}, \{R_6\}; \{R_4\}, \{R_8\})$                                                                                       |
| 95 | $\{C_{4z}^+   00 \frac{3}{4}\},$<br>$\{C_{2x}   000\},$<br>T                       |                              | $\Gamma Z (\{R_2\}, \{R_6\}; \{R_4\}, \{R_8\});$<br>$MA (\{R_2\}, \{R_6\}; \{R_4\}, \{R_8\})$                                         |
| 96 | $\{C_{4z}^+   00 \frac{3}{4}\},$                                                   |                              | $\Gamma Z (\{R_2\}, \{R_6\}; \{R_4\}, \{R_8\})$                                                                                       |

| SG  | Generators                                                                      | HSP/Ls for one C-2 WP (IRRs) | HSP/Ls for two C-2 WPS (IRRs)                                                                                                            |
|-----|---------------------------------------------------------------------------------|------------------------------|------------------------------------------------------------------------------------------------------------------------------------------|
|     | $\{C_{2x} \mid \frac{11}{22} 0\},$<br>T                                         |                              |                                                                                                                                          |
| 97  | $\{C_{4z}^+ \mid 000\},$<br>$\{C_{2x} \mid 000\},$<br>T                         |                              | $\Gamma \wedge \Gamma Z (\{R_2\}, \{R_6\}; \{R_4\}, \{R_8\});$<br>$ZV (\{R_2\}, \{R_6\}; \{R_4\}, \{R_8\})$                              |
| 98  | $\{C_{4z}^+ \mid \frac{311}{442}\},$<br>$\{C_{2x} \mid 0 \frac{11}{22}\},$<br>T |                              | $P (\{R_1, R_4\});$<br>$\Gamma \wedge \Gamma Z (\{R_2\}, \{R_6\}; \{R_4\}, \{R_8\});$<br>$ZV (\{R_2\}, \{R_6\}; \{R_4\}, \{R_8\})$       |
| 168 | $\{C_6^+ \mid 000\},$<br>T                                                      |                              | $\Gamma A (\{R_2\}, \{R_{10}\}; \{R_2\}, \{R_6\}; \{R_4\}, \{R_{12}\};$<br>$\{R_4\}, \{R_8\}; \{R_6\}, \{R_{10}\}; \{R_8\}, \{R_{12}\})$ |
| 169 | $\{C_6^+ \mid 00 \frac{1}{6}\},$<br>T                                           |                              | $\Gamma A (\{R_2\}, \{R_{10}\}; \{R_2\}, \{R_6\}; \{R_4\}, \{R_{12}\};$<br>$\{R_4\}, \{R_8\}; \{R_6\}, \{R_{10}\}; \{R_8\}, \{R_{12}\})$ |
| 170 | $\{C_6^+ \mid 00 \frac{5}{6}\},$<br>T                                           |                              | $\Gamma A (\{R_2\}, \{R_{10}\}; \{R_2\}, \{R_6\}; \{R_4\}, \{R_{12}\};$<br>$\{R_4\}, \{R_8\}; \{R_6\}, \{R_{10}\}; \{R_8\}, \{R_{12}\})$ |
| 171 | $\{C_6^+ \mid 00 \frac{1}{3}\},$<br>T                                           |                              | $\Gamma A (\{R_2\}, \{R_{10}\}; \{R_2\}, \{R_6\}; \{R_4\}, \{R_{12}\};$<br>$\{R_4\}, \{R_8\}; \{R_6\}, \{R_{10}\}; \{R_8\}, \{R_{12}\})$ |
| 172 | $\{C_6^+ \mid 00 \frac{2}{3}\},$<br>T                                           |                              | $\Gamma A (\{R_2\}, \{R_{10}\}; \{R_2\}, \{R_6\}; \{R_4\}, \{R_{12}\};$<br>$\{R_4\}, \{R_8\}; \{R_6\}, \{R_{10}\}; \{R_8\}, \{R_{12}\})$ |
| 173 | $\{C_6^+ \mid 00 \frac{1}{2}\},$<br>T                                           |                              | $\Gamma A (\{R_2\}, \{R_{10}\}; \{R_2\}, \{R_6\}; \{R_4\}, \{R_{12}\};$<br>$\{R_4\}, \{R_8\}; \{R_6\}, \{R_{10}\}; \{R_8\}, \{R_{12}\})$ |
| 177 | $\{C_6^+ \mid 000\},$<br>$\{C_{21}' \mid 000\},$<br>T                           |                              | $\Gamma A (\{R_2\}, \{R_{10}\}; \{R_2\}, \{R_6\}; \{R_4\}, \{R_{12}\};$<br>$\{R_4\}, \{R_8\}; \{R_6\}, \{R_{10}\}; \{R_8\}, \{R_{12}\})$ |
| 178 | $\{C_6^+ \mid 00 \frac{1}{6}\},$<br>$\{C_{21}' \mid 000\},$<br>T                |                              | $\Gamma A (\{R_2\}, \{R_{10}\}; \{R_2\}, \{R_6\}; \{R_4\}, \{R_{12}\};$<br>$\{R_4\}, \{R_8\}; \{R_6\}, \{R_{10}\}; \{R_8\}, \{R_{12}\})$ |
| 179 | $\{C_6^+ \mid 00 \frac{5}{6}\},$<br>$\{C_{21}' \mid 000\},$<br>T                |                              | $\Gamma A (\{R_2\}, \{R_{10}\}; \{R_2\}, \{R_6\}; \{R_4\}, \{R_{12}\};$<br>$\{R_4\}, \{R_8\}; \{R_6\}, \{R_{10}\}; \{R_8\}, \{R_{12}\})$ |
| 180 | $\{C_6^+ \mid 00 \frac{1}{3}\},$<br>$\{C_{21}' \mid 000\},$                     |                              | $\Gamma A (\{R_2\}, \{R_{10}\}; \{R_2\}, \{R_6\}; \{R_4\}, \{R_{12}\};$<br>$\{R_4\}, \{R_8\}; \{R_6\}, \{R_{10}\}; \{R_8\}, \{R_{12}\})$ |

| SG  | Generators                                                 | HSP/Ls for one C-2 WP (IRRs) | HSP/Ls for two C-2 WPS (IRRs)                                                                                                            |
|-----|------------------------------------------------------------|------------------------------|------------------------------------------------------------------------------------------------------------------------------------------|
|     | T                                                          |                              |                                                                                                                                          |
| 181 | $\{C_6^+   00 \frac{2}{3}\},$<br>$\{C_{21}'   000\},$<br>T |                              | $\Gamma A (\{R_2\}, \{R_{10}\}; \{R_2\}, \{R_6\}; \{R_4\}, \{R_{12}\};$<br>$\{R_4\}, \{R_8\}; \{R_6\}, \{R_{10}\}; \{R_8\}, \{R_{12}\})$ |
| 182 | $\{C_6^+   00 \frac{1}{2}\},$<br>$\{C_{21}'   000\},$<br>T |                              | $\Gamma A (\{R_2\}, \{R_{10}\}; \{R_2\}, \{R_6\}; \{R_4\}, \{R_{12}\};$<br>$\{R_4\}, \{R_8\}; \{R_6\}, \{R_{10}\}; \{R_8\}, \{R_{12}\})$ |
